# Supplementary material for: Soil nutrients, enzyme activities, and bacterial communities in varied plant communities in karst rocky desertification regions in Wushan County, Southwest China
Source: Frontiers journal article supplement (doi:10.3389/fmicb.2023.1180562), 2023-06-14

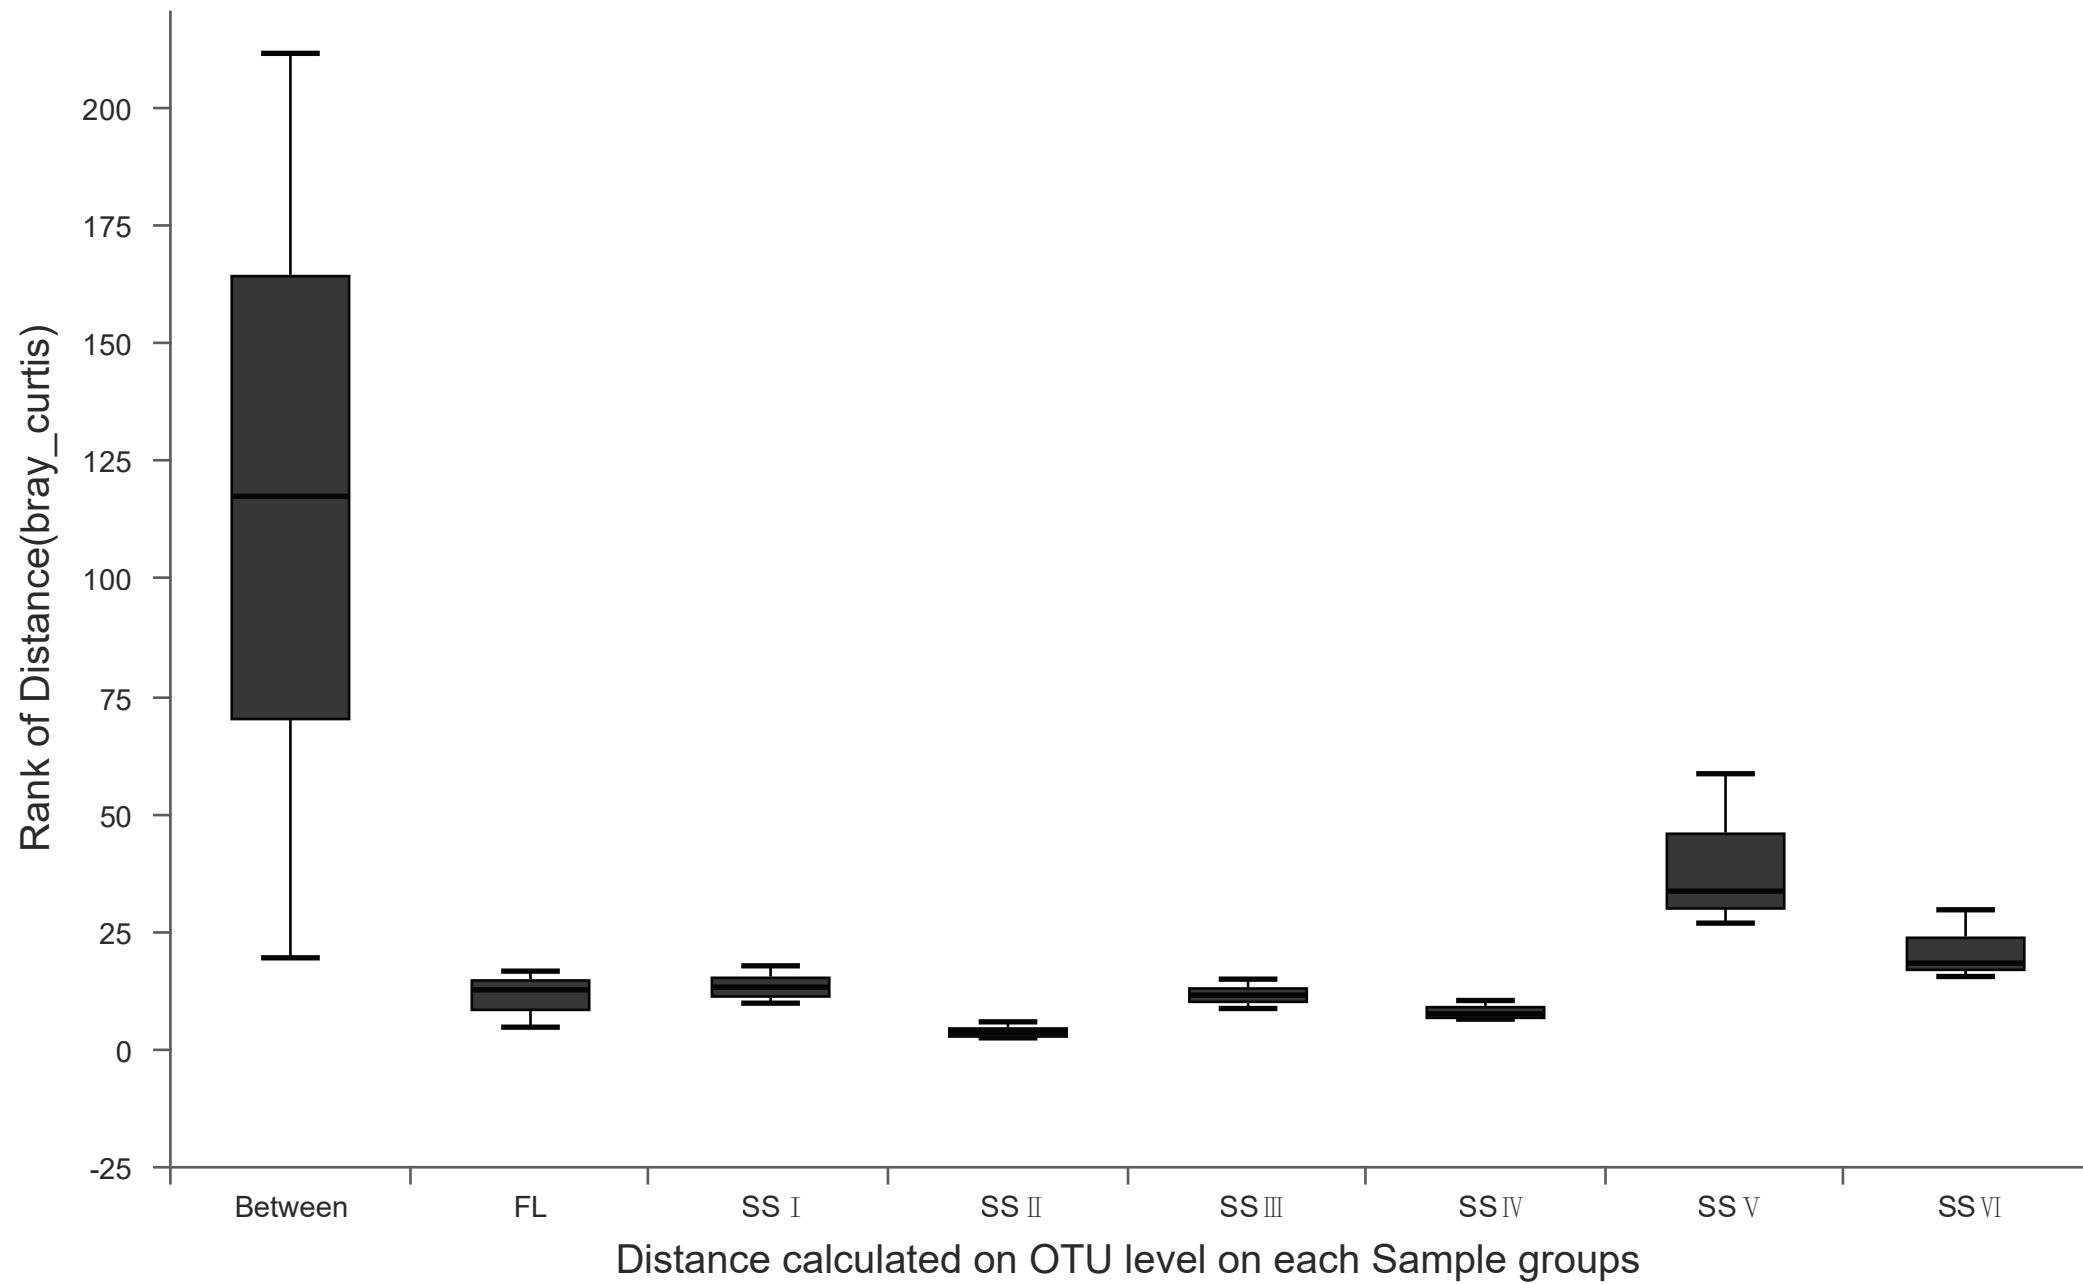

Supplement: Image_3.pdf [file Image_3.pdf]
